# Supplementary material for: Changes in adult sex ratio in wild bee communities are linked to urbanization
Source: PubMed Central journal article supplement (PMC6403428; doi:10.1038/s41598-019-39601-8), 2019-03-06
Supplement: 41598_2019_39601_MOESM1_ESM.pdf [file 41598_2019_39601_MOESM1_ESM.pdf]

## Supplementary Information Title Page

Changes in adult sex ratio in wild bee communities are linked to urbanization

### First Authors

Gordon Fitch<sup>1</sup>, \*Paul Glaum<sup>1</sup> (corresponding author), Maria-Carolina Simao<sup>2</sup>, Chatura Vaidya<sup>1</sup>

### Contributing Authors:

Jill Matthijs<sup>3</sup>, Benjamin Iuliano<sup>4</sup>, Ivette Perfecto<sup>3</sup>

\* [prglaum@umich.edu](mailto:prglaum@umich.edu)

1 – Department of Ecology and Evolutionary Biology University of Michigan 1105 North  
University Ann Arbor, MI 48109 USA, 734-764-1446

2 – New Jersey Agricultural Experiment Station Rutgers University 88 Lipman Dr, New  
Brunswick, NJ 08901

3 – School of Environment and Sustainability University of Michigan 830 North University 440  
Church St, Ann Arbor, MI 48109

4 – University of Wisconsin, Wisconsin Energy Institute 1552 University Ave Madison, WI 53726

### Supplementary Information

Three Supplementary Figures and eleven Supplementary Tables of data and additional  
analysis.

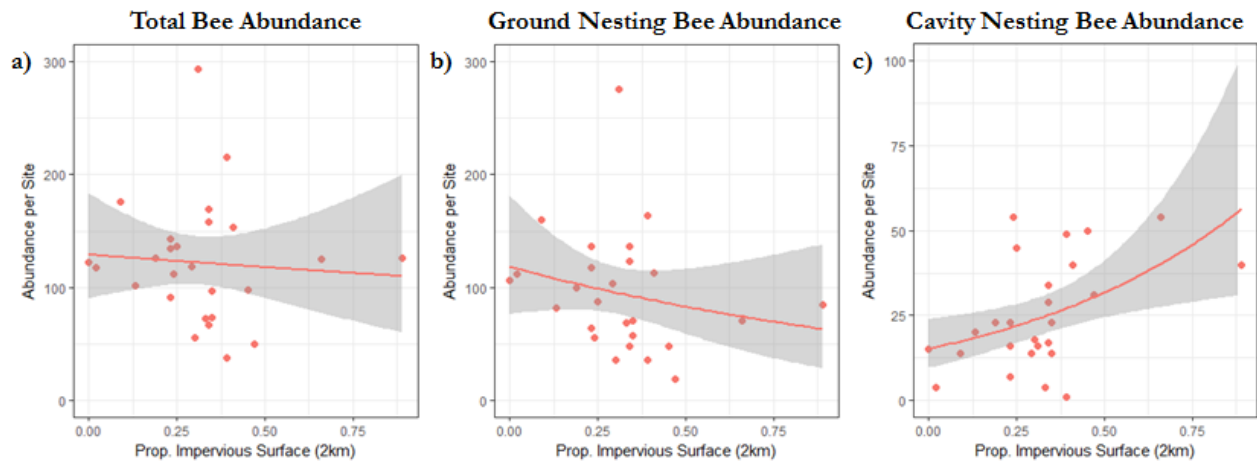

Figure S1: **Relationship between urbanity and bee abundance.** Urbanity was measured through proportional impervious surface coverage within a 2km radius of study site.

Regressions were done using GLM with quasi-Poisson distribution. a) Total bee abundance:  $t = -0.357$ ,  $df=24$ ,  $\beta = -0.1796$ ,  $p=0.724$ . b) Ground nesting bee abundance:  $t = -1.087$ ,  $df=24$ ,  $\beta = -0.7033$ ,  $p = 0.288$ . c) Cavity nesting bee abundance:  $t = 2.712$ ,  $df=24$ ,  $\beta = 1.470$ ,  $p=0.012$ .

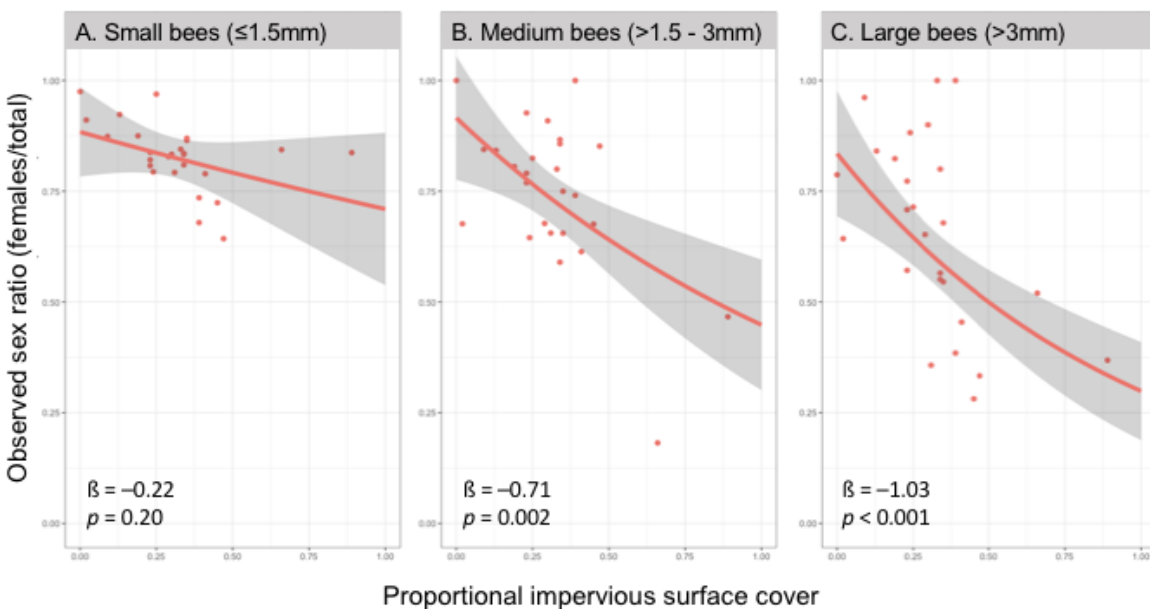

Figure S2: **Relationship between urbanity and bee observed sex ratio as mediated by body size.** Body size was measurements are taken from the intertegular distance, which is a

proxy for flight distance. Urbanity measured as proportional impervious surface cover within 2km of the study site. Line represents best fit for GLM model of number of female bees offset by total number of bees, using Poisson distribution and log-link; shaded area represents standard error. z-scores for each size class are as follow: a) small bees,  $z = -1.28$ ; b) medium bees,  $z = -3.09$ ; c) large bees,  $z = -4.06$ ; in all cases d.f. = 24.

### Sampling Sites Across Southeastern Michigan's Urban Gradient

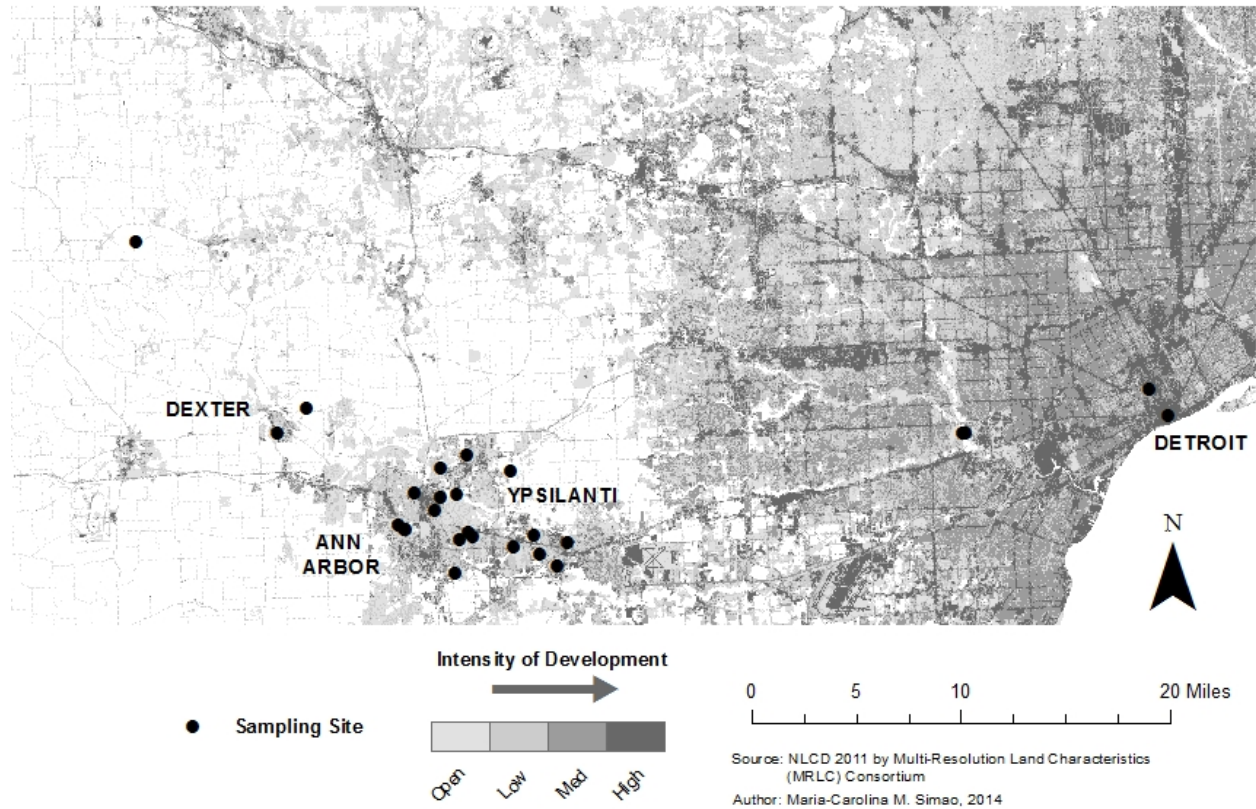

Figure S3. Black dots represent sampling sites used in our study from the rural to urban gradient in S.E. Michigan. Degree of urbanization is depicted by light grey (low ISC) to dark grey (high ISC) colours.

Table S1: **List of individual bee specimens.** (see attached file)

Table S2: List of bee species collected with natural history information. (see attached file)

Table S3: Model comparison for spatially autocorrelated models with (spatial) and without (non-spatial) Moran's eigenvectors included to account for spatial autocorrelation. \*p < 0.05, \*\*p < 0.01, \*\*\*p<0.001.

| Model                                               | Non-spatial               |                      |       | Spatial                   |                      |       |
|-----------------------------------------------------|---------------------------|----------------------|-------|---------------------------|----------------------|-------|
|                                                     | $\beta$                   | Res. dev.            | AIC   | $\beta$                   | Res. dev.            | AIC   |
| Ground nester OSR ~ urbanization                    | -0.644<br>$\pm$ 0.140 *** | 16.487 <sub>24</sub> | 175.4 | -0.568<br>$\pm$ 0.155 *** | 15.206 <sub>23</sub> | 176.1 |
| Eusocial ground nester OSR ~ urbanization           | -0.385<br>$\pm$ 0.164 *   | 19.069 <sub>24</sub> | 167.3 | -0.365<br>$\pm$ 0.164 *   | 17.577 <sub>23</sub> | 167.8 |
| Large ground nester OSR ~ urbanization              | -1.151<br>$\pm$ 0.281 *** | 26.779 <sub>24</sub> | 141.0 | -1.242<br>$\pm$ 0.327 *** | 26.473 <sub>23</sub> | 142.7 |
| Non- <i>Bombus</i> ground nester OSR ~ urbanization | -0.588<br>$\pm$ 0.162 *** | 7.327 <sub>24</sub>  | 160.8 | -0.575<br>$\pm$ 0.162 *** | 5.651 <sub>22</sub>  | 163.2 |

Table S4: Regressions against observed sex ratio at sites with temperature measurements. Regressions only include sites where temperature data loggers were able to be retrieved (see Table S9).

| Effect on female ratio | Residual deviance   | Significance - $p$                | Effect Size - $\beta$                                         | AIC    |
|------------------------|---------------------|-----------------------------------|---------------------------------------------------------------|--------|
| 500m                   | 12.99 <sub>20</sub> | (500m) 0.001                      | $-0.30 \pm 0.09$                                              | 155.01 |
| 1km                    | 10.79 <sub>20</sub> | (1km) $4.4e^{-4}$                 | $-0.40 \pm 0.11$                                              | 152.81 |
| 1.5km                  | 9.67 <sub>20</sub>  | (1.5km) $2.2e^{-4}$               | $-0.50 \pm 0.14$                                              | 151.69 |
| 2km                    | 10.52 <sub>20</sub> | (2km) $3.2e^{-4}$                 | $-0.55 \pm 0.15$                                              | 152.54 |
| Temperature            | 15.01 <sub>20</sub> | (Temp)0.004                       | $-0.02 \pm 0.01$                                              | 157.12 |
| 2km + Temperature      | 10.47 <sub>19</sub> | (2km)0.03<br>(Temp)0.82           | (2km) $-0.51 \pm 0.24$<br>(Temp) $-0.002 \pm 8e^{-3}$         | 154.49 |
| 2km + Floral abundance | 10.28 <sub>19</sub> | (2km) $4.07e^{-4}$<br>(Abund)0.83 | (2km) $-0.56 \pm 0.16$<br>(Abund) $-4.94e^{-7} \pm 2.3e^{-6}$ | 154.36 |
| 2km + Floral area      | 9.56 <sub>19</sub>  | (2km) $5.48e^{-4}$<br>(Area)0.38  | (2km) $-0.53 \pm 0.15$<br>(Area) $2.28e^{-7} \pm 2.6e^{-7}$   | 153.64 |
| 2km + Floral richness  | 9.39 <sub>19</sub>  | (2km)0.007<br>(Richness)0.33      | (2km) $-0.47 \pm 0.17$<br>(Richness) $-0.001 \pm 0.001$       | 153.46 |

Table S5: **Model comparison for predicting bee observed sex ratio in ground nesting**

**bees.** The first four rows present the effect of impervious surface cover measured within circles of increasing radii (i.e. within 500m of the garden, within 1km, etc.).

| Effect on female ratio | Residual deviance   | Significance - $p$                   | Effect Size - $\beta$                                       | AIC           |
|------------------------|---------------------|--------------------------------------|-------------------------------------------------------------|---------------|
| 500m                   | 24.92 <sub>24</sub> | (500m) $2.7e^{-4}$                   | $-0.35 \pm 0.10$                                            | 183.81        |
| 1km                    | 22.26 <sub>24</sub> | (1km) $7.01e^{-5}$                   | $-0.44 \pm 0.11$                                            | 181.15        |
| 1.5km                  | 18.90 <sub>24</sub> | (1.5km) $1.26e^{-5}$                 | $-0.55 \pm 0.13$                                            | 177.78        |
| 2km                    | 16.48 <sub>24</sub> | (2km) $3.71e^{-6}$                   | $-0.65 \pm 0.14$                                            | <u>175.36</u> |
| 2km + Floral abundance | 16.29 <sub>23</sub> | (2km) $3.02e^{-5}$<br>(Abund)0.66    | (2km) $-0.62 \pm 0.15$<br>(Abund) $1.1e^{-6} \pm 2.5e^{-6}$ | 177.21        |
| 2km + Floral area      | 15.85 <sub>23</sub> | (2km) $1.38e^{-5}$<br>(Area)0.42     | (2km) $-0.62 \pm 0.14$<br>(Area) $2.06e^{-7} \pm 2.6e^{-7}$ | 176.78        |
| 2km + Floral richness  | 16.46 <sub>23</sub> | (2km) $1.38e^{-5}$<br>(Richness)0.86 | (2km) $-0.65 \pm 0.15$<br>(Richness) $2.19e^{-4} \pm 0.001$ | 177.38        |

Table S6: **Model comparison for predicting bee observed sex ratio in cavity nesting bees.**

The first four rows present the effect of impervious surface cover measured within circles of increasing radii (i.e. within 500m of the garden, within 1km, etc.).

| Effect on female ratio | Residual deviance  | Significance - $p$          | Effect Size - $\beta$                                         | AIC    |
|------------------------|--------------------|-----------------------------|---------------------------------------------------------------|--------|
| 500m                   | 8.47 <sub>24</sub> | (500m)0.11                  | $-0.25 \pm 0.16$                                              | 128.45 |
| 1km                    | 8.31 <sub>24</sub> | (1km)0.10                   | $-0.30 \pm 0.18$                                              | 128.28 |
| 1.5km                  | 8.60 <sub>24</sub> | (1.5km)0.12                 | $-0.34 \pm 0.22$                                              | 128.57 |
| 2km                    | 9.02 <sub>24</sub> | (2km)0.16                   | $-0.35 \pm 0.24$                                              | 129.00 |
| 2km + Floral abundance | 8.77 <sub>23</sub> | (2km)0.14<br>(Abund)0.61    | (2km) $-0.37 \pm 0.25$<br>(Abund) $-2.11e^{-6} \pm 4.2e^{-6}$ | 130.74 |
| 2km + Floral area      | 8.58 <sub>23</sub> | (2km)0.16<br>(Area)0.50     | (2km) $-0.34 \pm 0.24$<br>(Area) $3.31e^{-7} \pm 4.95e^{-7}$  | 130.55 |
| 2km + Floral richness  | 8.55 <sub>23</sub> | (2km)0.22<br>(Richness)0.49 | (2km) $-0.31 \pm 0.25$<br>(Richness) $-0.001 \pm 0.002$       | 130.52 |

Table S7: **Relationship between urbanity and floral resource availability.**

| <b>Relationship between Impervious Surface (2km) and Floral Resources</b> |                      |                 |                 |
|---------------------------------------------------------------------------|----------------------|-----------------|-----------------|
| <b>Floral resource metric</b>                                             | <b>Residual dev.</b> | <b><i>t</i></b> | <b><i>p</i></b> |
| Season-long mean abundance                                                | 23.07 <sub>24</sub>  | -1.42           | 0.17            |
| Season-long mean area                                                     | 24.79 <sub>24</sub>  | -0.46           | 0.65            |
| Season-long total richness                                                | 23.28 <sub>24</sub>  | 1.33            | 0.20            |

Table S8: Results of GLMs assessing the relationship between bee observed sex ratio (OSR) and impervious surface cover within 2km of survey sites, including only sites with <50% impervious surface cover. \* $p < 0.05$ , \*\* $p < 0.01$ , \*\*\* $p < 0.001$ .

|                           | <b>&lt;50% impervious surface sites</b> |                 |                          | <b>All sites</b>          |                 |                          |
|---------------------------|-----------------------------------------|-----------------|--------------------------|---------------------------|-----------------|--------------------------|
| <b>Response variable</b>  | <b><math>\beta</math></b>               | <b><i>z</i></b> | <b>Residual deviance</b> | <b><math>\beta</math></b> | <b><i>z</i></b> | <b>Residual deviance</b> |
| <b>All bee OSR</b>        | -0.67 ± 0.17<br>***                     | -3.88           | 12.46 <sub>22</sub>      | -0.56 ± 0.12<br>***       | -4.73           | 13.29 <sub>24</sub>      |
| <b>Ground nesters OSR</b> | -0.71 ± 0.19<br>***                     | -3.70           | 15.87 <sub>22</sub>      | -0.64 ± 0.14<br>***       | -4.60           | 16.49 <sub>24</sub>      |
| <b>Cavity nesters OSR</b> | -0.52 ± 0.43                            | -1.19           | 8.63 <sub>22</sub>       | -0.34 ± 0.24              | -1.42           | 9.02 <sub>24</sub>       |

Table S9: Site characteristics.

| Site Name                          | Initials | City Group | Managing Organization | Temperature Data Logger |
|------------------------------------|----------|------------|-----------------------|-------------------------|
| Arboretum                          | A        | Ann Arbor  | U of M                | Yes                     |
| Boehnke Household                  | BH       | Ann Arbor  | Independent           | Yes                     |
| Buhr Park                          | B        | Ann Arbor  | Project Grow          | No                      |
| Cultivating Community              | CC       | Ann Arbor  | U of M                | Yes                     |
| Clague Elementary                  | CE       | Ann Arbor  | Project Grow          | Yes                     |
| Campus Farm                        | CF       | Ann Arbor  | U of M                | Yes                     |
| County Farm Park                   | CFP      | Ann Arbor  | Project Grow          | Yes                     |
| Ellsworth                          | E        | Ann Arbor  | Project Grow          | Yes                     |
| Greenview                          | GV       | Ann Arbor  | Project Grow          | Yes                     |
| Leslie Science Center              | LSC      | Ann Arbor  | Project Grow          | Yes                     |
| Platt                              | P        | Ann Arbor  | Project Grow          | Yes                     |
| Scio Church                        | SC       | Ann Arbor  | Independent           | Yes                     |
| SPH Garden                         | SPH      | Ann Arbor  | U of M                | Yes                     |
| West Park                          | WP       | Ann Arbor  | Project Grow          | Yes                     |
| Organic Garden                     | OG       | Dearborn   | U of M                | Yes                     |
| Old Field                          | OF       | Dearborn   | U of M                | No                      |
| Lafayette Greens                   | LG       | Detroit    | Independent           | Yes                     |
| N. Cass Community Garden           | NC       | Detroit    | Independent           | No                      |
| Dexter Community Garden            | DCG      | Dexter     | Independent           | Yes                     |
| E.S. George Reserve                | ESG      | Dexter     | U of M                | Yes                     |
| M'Lis Farm                         | MF       | Dexter     | Independent           | Yes                     |
| Catholic Social Services           | CSS      | Ypsilanti  | Growing Hope          | Yes                     |
| EMU - The Giving Garden            | EMU      | Ypsilanti  | Growing Hope          | Yes                     |
| Frog Island Community Garden       | FI       | Ypsilanti  | Growing Hope          | Yes                     |
| Normal Park Community Garden       | NP       | Ypsilanti  | Growing Hope          | Yes                     |
| Perry / Parkridge Community Garden | PCG      | Ypsilanti  | Growing Hope          | No                      |

Table S10: List of proportional impervious surface coverage around each site. (see attached file)

Table S11: List of floral data measured at each site. (see attached file)
